# Supplementary material for: Analysis of the electronic delocalization in some isoelectronic analogues of B12 doped with beryllium and/or carbon
Source: Royal Society of Chemistry journal article supplement (doi:10.1039/d0cp01844a), 2020-01-01
Supplement: d0cp01844a1.pdf [file d0cp01844a1.pdf]

# Supporting Information

## Analysis of the electronic delocalization in some $B_{12}$ 's isoelectronic analogues doped with beryllium and/or carbon

Rafael Islas,<sup>1,2</sup> Diego Inostroza,<sup>3</sup> David Arias-Olivares,<sup>1,4</sup> Bernardo Zúñiga-Gutiérrez,<sup>2</sup> Jordi  
Poater,<sup>5,6</sup> and Miquel Solà<sup>7</sup>

<sup>1</sup>Departamento de Ciencias Químicas, Facultad de Ciencias Exactas, Universidad Andres Bello, Av. República  
275, Santiago, Chile

<sup>2</sup>Departamento de Química, Centro Universitario de Ciencias Exactas e Ingenierías, Universidad de  
Guadalajara, Blvd. Marcelino García Barragán 1421, C.P. 44430, Guadalajara, Jalisco, México.

<sup>3</sup>Doctorado en Físicoquímica molecular, Universidad Andres Bello, Av. República 275, Santiago, Chile

<sup>4</sup>Center of Applied Nanoscience (CANS), Facultad de Ciencias Exactas, Universidad Andres Bello, Av.  
República 275, Santiago, Chile

<sup>5</sup>Departament de Química Inorgànica i Orgànica & IQTCUB, Universitat de Barcelona, Martí i Franquès 1-11,  
08028 Barcelona, Catalonia, Spain

<sup>6</sup>ICREA, Pg. Lluís Companys 23, 08010 Barcelona, Spain

<sup>7</sup>Institut de Química Computacional i Catàlisi (IQCC) and Departament de Química, Universitat de Girona, C/  
Maria Aurèlia Capmany 69, 17003 Girona, Catalonia, Spain

Mail to: rafael.islas@unab.cl, bernardo.zuniga@academicos.udg.mx, miquel.sola@udg.edu

## Content:

### Section 1. Global minimum Cartesian coordinates:

$B_{12}$  SI3

$B_{11}C^+$  SI3

$B_{11}Be^-$  SI4

$B_{10}C_2^{+2}$  SI4

$B_{10}Be_2^{-2}$  SI5

$B_{10}BeC$  SI5

$B_9C_2Be^+$  SI6

$B_9CBe_2^-$  SI6

$C_6B_6$  SI7

**Section 1. Global minimum's Cartesian coordinates (in Å).**

B<sub>12</sub>

|   |              |              |              |
|---|--------------|--------------|--------------|
| B | 0.841237000  | 0.485689000  | 0.389523000  |
| B | 0.000000000  | 2.016474000  | -0.039823000 |
| B | -0.841237000 | 0.485689000  | 0.389523000  |
| B | 1.600297000  | 1.820166000  | -0.174850000 |
| B | 1.746318000  | -1.008237000 | -0.039823000 |
| B | 2.376459000  | 0.475815000  | -0.174850000 |
| B | 0.776162000  | -2.295981000 | -0.174850000 |
| B | -0.776162000 | -2.295981000 | -0.174850000 |
| B | -2.376459000 | 0.475815000  | -0.174850000 |
| B | -1.600297000 | 1.820166000  | -0.174850000 |
| B | -1.746318000 | -1.008237000 | -0.039823000 |
| B | 0.000000000  | -0.971377000 | 0.389523000  |

B<sub>11</sub>C<sup>+</sup>

|   |              |              |              |
|---|--------------|--------------|--------------|
| B | -0.102363000 | 2.323147000  | -0.275318000 |
| B | -1.434534000 | 1.413680000  | -0.030999000 |
| B | -2.430422000 | 0.177793000  | -0.172262000 |
| B | -2.025345000 | -1.315556000 | -0.251721000 |
| B | -0.522004000 | -1.939124000 | -0.086011000 |
| B | 1.068498000  | -2.169022000 | -0.230846000 |
| B | 2.148827000  | -1.063460000 | -0.187970000 |
| B | 1.908001000  | 0.510132000  | -0.051807000 |
| C | 1.226699000  | 1.821993000  | -0.176567000 |
| B | 0.234856000  | 0.885582000  | 0.493837000  |
| B | 0.658098000  | -0.749413000 | 0.506700000  |
| B | -0.975651000 | -0.260151000 | 0.498277000  |

$B_{11}Be^-$ 

|    |              |              |              |
|----|--------------|--------------|--------------|
| B  | 1.800340000  | -1.870529000 | -0.055809000 |
| B  | 2.456071000  | -0.447513000 | -0.047591000 |
| B  | 1.746496000  | 1.005279000  | -0.010191000 |
| B  | 0.838989000  | -0.536855000 | 0.121825000  |
| Be | 0.002031000  | -2.326614000 | -0.025545000 |
| B  | -1.797089000 | -1.873549000 | -0.056072000 |
| B  | -0.838000000 | -0.538296000 | 0.121319000  |
| B  | -2.455241000 | -0.451631000 | -0.047527000 |
| B  | -1.748201000 | 1.002333000  | -0.010055000 |
| B  | -0.779291000 | 2.323724000  | -0.054249000 |
| B  | -0.000873000 | 0.923375000  | 0.113684000  |
| B  | 0.775174000  | 2.324953000  | -0.054899000 |

 $B_{10}C_2^{+2}$ 

|   |              |              |              |
|---|--------------|--------------|--------------|
| B | 1.022410000  | -1.738153000 | -0.071646000 |
| B | -0.505741000 | -2.274952000 | -0.331912000 |
| C | -1.636000000 | -1.427286000 | -0.163825000 |
| B | -1.953508000 | 0.000088000  | -0.067429000 |
| C | -1.635868000 | 1.427431000  | -0.163831000 |
| B | -0.505533000 | 2.274998000  | -0.331908000 |
| B | 1.022567000  | 1.738054000  | -0.071648000 |
| B | 2.316813000  | 0.775594000  | -0.233133000 |
| B | 2.316730000  | -0.775796000 | -0.233135000 |
| B | 1.044801000  | -0.000039000 | 0.573429000  |
| B | -0.416186000 | -0.852242000 | 0.580284000  |
| B | -0.416111000 | 0.852272000  | 0.580286000  |

$B_{10}Be_2^{-2}$ 

|    |              |              |              |
|----|--------------|--------------|--------------|
| Be | -1.150373000 | -1.992615000 | -0.000119000 |
| B  | -2.512761000 | -0.780364000 | -0.000208000 |
| B  | -2.512836000 | 0.780114000  | -0.000052000 |
| Be | -1.150586000 | 1.992522000  | 0.000146000  |
| B  | -1.038678000 | -0.000047000 | 0.000211000  |
| B  | 0.439684000  | 0.864493000  | -0.000089000 |
| B  | 0.439761000  | -0.864463000 | 0.000020000  |
| B  | 0.623115000  | 2.511665000  | 0.000318000  |
| B  | 0.623374000  | -2.511614000 | 0.000120000  |
| B  | 1.892094000  | -1.612935000 | 0.000148000  |
| B  | 1.995079000  | 0.000100000  | -0.000050000 |
| B  | 1.891935000  | 1.613126000  | -0.000439000 |

 $B_{10}BeC$ 

|    |              |              |              |
|----|--------------|--------------|--------------|
| B  | 0.370671000  | -2.217847000 | -0.377589000 |
| B  | -1.114426000 | -1.663420000 | -0.040534000 |
| B  | -2.340904000 | -0.673703000 | -0.188655000 |
| B  | -2.229250000 | 0.861351000  | -0.259402000 |
| B  | -0.893186000 | 1.762912000  | -0.126137000 |
| B  | 0.599819000  | 2.304464000  | -0.246801000 |
| B  | 1.876172000  | 1.442088000  | -0.212413000 |
| B  | -1.014579000 | 0.048607000  | 0.525662000  |
| B  | 0.487529000  | 0.872923000  | 0.552569000  |
| B  | 1.963774000  | -0.141762000 | -0.056608000 |
| C  | 1.591769000  | -1.539267000 | -0.241882000 |
| Be | 0.480320000  | -0.935617000 | 0.900208000  |

$B_9C_2Be^+$ 

|    |              |              |              |
|----|--------------|--------------|--------------|
| B  | -0.646664000 | 2.007910000  | 0.000027000  |
| B  | 0.944503000  | 1.767037000  | -0.000008000 |
| B  | 2.401692000  | 1.222698000  | -0.000144000 |
| B  | 2.861278000  | -0.259299000 | 0.000209000  |
| B  | 1.175709000  | 0.009978000  | -0.000123000 |
| B  | 1.989379000  | -1.549768000 | -0.000036000 |
| B  | 0.412500000  | -1.698963000 | 0.000023000  |
| C  | -1.027524000 | -1.805692000 | -0.000063000 |
| B  | -2.294919000 | -1.273667000 | -0.000048000 |
| B  | -2.701014000 | 0.268663000  | 0.000052000  |
| C  | -1.906229000 | 1.414999000  | -0.000020000 |
| Be | -0.777452000 | -0.032194000 | 0.000186000  |

 $B_9CBe_2^-$ 

|    |              |              |             |
|----|--------------|--------------|-------------|
| C  | -0.704454000 | 2.310537000  | 0.000000000 |
| B  | 0.718664000  | 2.468135000  | 0.000000000 |
| B  | 0.000000000  | 0.965394000  | 0.000000000 |
| B  | 2.518942000  | -0.628113000 | 0.000000000 |
| Be | -1.930845000 | 1.140251000  | 0.000000000 |
| Be | 2.006708000  | 1.132999000  | 0.000000000 |
| B  | 0.877567000  | -0.468308000 | 0.000000000 |
| B  | -0.000539000 | -2.013751000 | 0.000000000 |
| B  | 1.634238000  | -1.903721000 | 0.000000000 |
| B  | -1.627225000 | -1.905212000 | 0.000000000 |
| B  | -0.844259000 | -0.494973000 | 0.000000000 |
| B  | -2.492733000 | -0.610697000 | 0.000000000 |

C<sub>6</sub>B<sub>6</sub>

|    |              |              |              |
|----|--------------|--------------|--------------|
| Be | -1.547034000 | 1.845552000  | 0.150193000  |
| C  | -2.693212000 | -0.622567000 | -0.014046000 |
| C  | -2.693135000 | 0.622553000  | -0.014007000 |
| Be | -1.547072000 | -1.845539000 | 0.150043000  |
| Be | -0.884206000 | 0.000050000  | -0.398508000 |
| C  | 0.000026000  | 1.485704000  | 0.000216000  |
| C  | -0.000020000 | -1.485617000 | 0.000282000  |
| C  | 2.693155000  | -0.622597000 | 0.013663000  |
| C  | 2.693188000  | 0.622520000  | 0.013634000  |
| Be | 0.884255000  | -0.000005000 | 0.398483000  |
| Be | 1.546991000  | -1.845634000 | -0.149879000 |
| Be | 1.547063000  | 1.845580000  | -0.149947000 |
